# Supplementary material for: Assessing Itch Severity: Content Validity and Psychometric Properties of a Patient-Reported Pruritus Numeric Rating Scale in Atopic Dermatitis
Source: PubMed Central journal article supplement — Adv Ther. 2024 Feb 16;41(4):1512–25. doi: 10.1007/s12325-024-02802-3 (PMC10960880; doi:10.1007/s12325-024-02802-3), 2024-02-16
Supplement: 12325_2024_2802_MOESM1_ESM.pdf [file 12325_2024_2802_MOESM1_ESM.pdf]

**Assessing itch severity: content validity and psychometric properties of a patient-reported Pruritus Numeric Rating Scale in atopic dermatitis**

Authors

Alissa Rams<sup>1</sup>; Jessica Baldasaro<sup>1</sup>; Laurine Bunod<sup>1</sup>; Laure Delbecque<sup>2</sup>; Sara Strzok<sup>1</sup>; Juliette Meunier<sup>1</sup> (ORCID-ID: 0000-0001-5372-5804); Hany ElMaraghy<sup>2</sup>; Luna Sun<sup>2</sup>; Evangeline Pierce<sup>2</sup>

<sup>1</sup>Modus Outcomes, a THREAD Company, Cambridge, MA, USA and Lyon, France

<sup>2</sup>Eli Lilly and Company, Indianapolis, IN, USA

Corresponding author

Sara Strzok, [sara.strzok@modusoutcomes.com](mailto:sara.strzok@modusoutcomes.com)

## Supplementary material

### Measures

#### *Sleep-Loss Scale*

The Sleep-Loss Scale is a novel scale that measures patient-reported sleep-interference due to itch. It consists of a single question “To what extent did your itching interfere with your sleep last night?” Response options range from 0 (“Not at all”) to 4 (“Unable to sleep at all”).

#### *Patient-Oriented Eczema Measure (POEM)*

The Patient-Oriented Eczema Measure (POEM) is a patient- or observer-reported measure used to monitor disease activity in children and adults with AD. It consists of 7 items about some symptoms and impacts of AD, with each item scored on a 5-pt scale ranging from “No Days” to “Every Day”. A total score out of 28 points is calculated based on item responses. The POEM has been evaluated for use in clinical practice and clinical trial settings [1].

#### *Dermatology Life Quality Index (DLQI)*

The Dermatology Life Quality Index (DLQI) is a PRO measure that aims to capture the quality-of-life impact of dermatological conditions on patients. It consists of 10 items about the impact of skin problems over the last week, with a 4-pt response scale ranging from “Very much” to “Not at all”. The DLQI has been evaluated for use in clinical settings for various dermatological conditions, including AD [2].

#### *Hospital Anxiety and Depression Scale (HADS)*

The Hospital Anxiety and Depression Scale (HADS) is a PRO used to detect and evaluate levels of anxiety and depression [3]. It has been widely used, and has been evaluated in adult and adolescent populations [4, 5]. The HADS has subscales for depression and anxiety, each with 7 items. Each item is scored on a 4-pt scale, ranging from 0 to 3, with 3 denoting the highest level of anxiety or depression. A total score of  $\geq 8$  out of 21 points on each subscale marks a significant level of anxiety or depressive symptoms.

#### *Global Assessment of Change for AD (GAC-AD)*

The Global Assessment of Change for AD (GAC-AD) is a single-item PRO. Patients were asked at the end of the clinical trial about their impression of the overall change in their AD.

#### *Investigator Global Assessment (IGA)*

The Investigator Global Assessment (IGA) is an instrument used in clinical settings to rate the overall severity of the patient’s AD. IGA ratings are based on a 5-point scale, ranging from 0 (clear) to 4 (severe). The IGA must be conducted prior to conducting the EASI assessment.

#### *Body Surface Area (BSA)*

Body surface area (BSA) is a clinical tool for measuring the amount skin involvement in patients with AD. BSA is estimated based on sections of the body (e.g., head and neck, each arm, legs, and trunk). BSA can also be estimated based on patients’ “handprints”, with each palm-sized area reflecting approximately 1% of patient’s BSA [6].

#### *Eczema Area and Severity Index (EASI)*

The Eczema Area and Severity Index (EASI) is a clinician-reported tool used to evaluate the severity and extent of AD. A composite score from 0 to 72 is given, based on body area and severity sub-scores. The EASI has been evaluated as a comprehensive, fit-for-purpose tool for both adult and adolescent populations [7].

## Conceptual saturation - Symptom and sleep impacts in AD (total sample n=21)

| <b>Group 1<br/>(n=4)</b>         | <b>Group 2<br/>(n=4)</b> | <b>Group 3<br/>(n=4)</b> | <b>Group 4<br/>(n=4)</b> | <b>Group 5<br/>(n=4)</b> |
|----------------------------------|--------------------------|--------------------------|--------------------------|--------------------------|
| Burning                          | Pain                     |                          |                          | --                       |
| Itch                             | Red spots                |                          |                          |                          |
| Rash                             | Stinging                 |                          |                          |                          |
| Redness                          | Tingling                 |                          |                          |                          |
| Skin cracked                     |                          |                          |                          |                          |
| Skin dry                         |                          |                          |                          |                          |
| Skin feels tight                 |                          |                          |                          |                          |
| Skin flaky                       |                          |                          |                          |                          |
| Skin irritation                  |                          |                          |                          |                          |
| Skin oozing or weeping           |                          |                          |                          |                          |
| Skin peeling                     |                          |                          |                          |                          |
| Skin sensitive                   |                          |                          |                          |                          |
| Sleep: difficulty falling asleep |                          |                          |                          |                          |
| Sleep: difficulty staying asleep |                          |                          |                          |                          |
| Sleep: restless sleep            |                          |                          |                          |                          |
| Sleep: tired next day            |                          |                          |                          |                          |
| Sleep: unable to sleep           |                          |                          |                          |                          |
| Soreness                         |                          |                          |                          |                          |
| <b>18 concepts</b>               | <b>4 concepts</b>        | <b>0 concepts</b>        | <b>0 concepts</b>        | <b>0 concepts</b>        |

## Participant-reported impact of AD (total sample n=21)

| <b>n ≥ 5 participants</b>                 | <b>n=4 participants</b> | <b>n=3 participants</b> | <b>n=2 participants</b> | <b>n=1 participant</b>  |
|-------------------------------------------|-------------------------|-------------------------|-------------------------|-------------------------|
| Modifications to mitigate symptoms (n=16) | Bleeding                | Anxiety                 | Mess from shed skin     | Open wounds             |
| Scratch: need to (n=11)                   | Distraction             | Stress                  | Range of motion         | Appearance              |
| Concentration (n=9)                       | Embarrassment           | Self-confidence         | Conversation            | Brushing teeth          |
| Scratch: until bleeding (n=7)             | Exercise                | Scratch: redness from   | Inconvenience           | Doing dishes            |
| Socializing (n=7)                         | Annoyance               | Studying                | Infection               | Dressing                |
| Work (n=7)                                | Sadness                 |                         |                         | Family impact           |
| Outdoor activities (n=6)                  |                         |                         |                         | Handwashing             |
| Scratch: in public (n=6)                  |                         |                         |                         | Irritation (emotional)  |
| Self-conscious (n=5)                      |                         |                         |                         | Isolation               |
| Clothing choice (n=5)                     |                         |                         |                         | Mood                    |
| Comments from others (n=5)                |                         |                         |                         | School impact           |
| Daily activity interference (n=5)         |                         |                         |                         | Using cleaning products |
| Frustration (n=5)                         |                         |                         |                         |                         |

## Participant-reported impact of AD (total sample n=21)

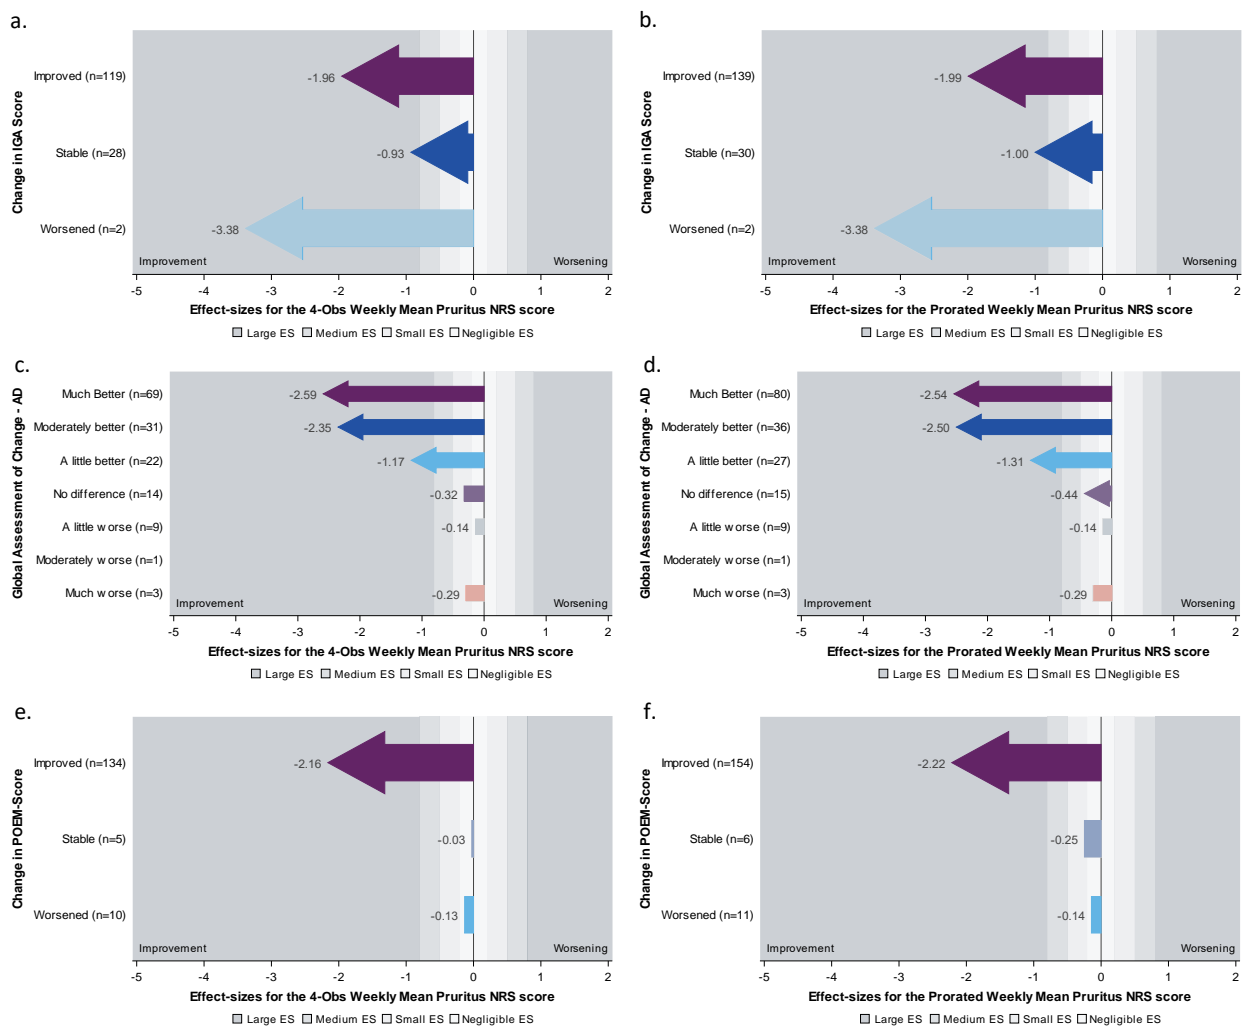

## Summary results of meaningful change analyses

| Method             | Anchor | Improvement vs. all others | Improvement vs. no change | Moderate improvement vs. no change | Minimal improvement vs. no change | Range       |
|--------------------|--------|----------------------------|---------------------------|------------------------------------|-----------------------------------|-------------|
| ROC                | IGA    | -2.00                      | -2.00                     | -2.00                              | -2.00                             |             |
| MEANS              | IGA    | -2.38                      | -2.38                     | -2.51                              | -1.85                             |             |
| ROC                | GAC-AD | -2.00                      | -2.00                     | -2.00                              | -2.00                             |             |
| MEANS              | GAC-AD | -3.55                      | -3.53                     | -2.49                              | -1.86                             |             |
| Distribution-based |        |                            |                           |                                    |                                   | 0.44 – 1.82 |

## COREQ (CONsolidated criteria for REporting Qualitative research) Checklist

A checklist of items that should be included in reports of qualitative research. You must report the page number in your manuscript where you consider each of the items listed in this checklist. If you have not included this information, either revise your manuscript accordingly before submitting or note N/A.

| Topic                                          | Item No. | Guide Questions/Description                                                                                                                              | Reported on section # |
|------------------------------------------------|----------|----------------------------------------------------------------------------------------------------------------------------------------------------------|-----------------------|
| <b>Domain 1: Research team and reflexivity</b> |          |                                                                                                                                                          |                       |
| <i>Personal characteristics</i>                |          |                                                                                                                                                          |                       |
| Interviewer/facilitator                        | 1        | Which author/s conducted the interview or focus group?                                                                                                   | 2.1                   |
| Credentials                                    | 2        | What were the researcher's credentials? E.g. PhD, MD                                                                                                     | n/a                   |
| Occupation                                     | 3        | What was their occupation at the time of the study?                                                                                                      | n/a                   |
| Gender                                         | 4        | Was the researcher male or female?                                                                                                                       | n/a                   |
| Experience and training                        | 5        | What experience or training did the researcher have?                                                                                                     | 2.1                   |
| <i>Relationship with participants</i>          |          |                                                                                                                                                          |                       |
| Relationship established                       | 6        | Was a relationship established prior to study commencement?                                                                                              | n/a                   |
| Participant knowledge of the interviewer       | 7        | What did the participants know about the researcher? e.g. personal goals, reasons for doing the research                                                 | 2.1                   |
| Interviewer characteristics                    | 8        | What characteristics were reported about the interviewer/facilitator? e.g. Bias, assumptions, reasons and interests in the research topic                | n/a                   |
| <b>Domain 2: Study design</b>                  |          |                                                                                                                                                          |                       |
| <i>Theoretical framework</i>                   |          |                                                                                                                                                          |                       |
| Methodological orientation and Theory          | 9        | What methodological orientation was stated to underpin the study? e.g. grounded theory, discourse analysis, ethnography, phenomenology, content analysis | 2.1.3                 |
| <i>Participant selection</i>                   |          |                                                                                                                                                          |                       |
| Sampling                                       | 10       | How were participants selected? e.g. purposive, convenience, consecutive, snowball                                                                       | 2.1                   |
| Method of approach                             | 11       | How were participants approached? e.g. face-to-face, telephone, mail, email                                                                              | n/a                   |
| Sample size                                    | 12       | How many participants were in the study?                                                                                                                 | 3.1                   |
| Non-participation                              | 13       | How many people refused to participate or dropped out? Reasons?                                                                                          | n/a                   |
| <i>Setting</i>                                 |          |                                                                                                                                                          |                       |
| Setting of data collection                     | 14       | Where was the data collected? e.g. home, clinic, workplace                                                                                               | 2.1, 3.1              |
| Presence of non-participants                   | 15       | Was anyone else present besides the participants and researchers?                                                                                        | n/a                   |
| Description of sample                          | 16       | What are the important characteristics of the sample? e.g. demographic data, date                                                                        | 3.1, Table 1          |
| <i>Data collection</i>                         |          |                                                                                                                                                          |                       |
| Interview guide                                | 17       | Were questions, prompts, guides provided by the authors? Was it pilot tested?                                                                            | 2.1                   |
| Repeat interviews                              | 18       | Were repeat interviews carried out? If yes, how many?                                                                                                    | n/a                   |
| Audio/visual recording                         | 19       | Did the research use audio or visual recording to collect the data?                                                                                      | 2.1                   |
| Field notes                                    | 20       | Were field notes made during and/or after the interview or focus group?                                                                                  | 2.1                   |
| Duration                                       | 21       | What was the duration of the interviews or focus group?                                                                                                  | 2.1                   |
| Data saturation                                | 22       | Was data saturation discussed?                                                                                                                           | 2.1, 3.1.1            |
| Transcripts returned                           | 23       | Were transcripts returned to participants for comment and/or                                                                                             | n/a                   |

Assessing itch severity in atopic dermatitis: Pruritis Numeric Rating Scale: supplementary material

| Topic                                  | Item No. | Guide Questions/Description                                                                                                        | Reported on Page No. |
|----------------------------------------|----------|------------------------------------------------------------------------------------------------------------------------------------|----------------------|
|                                        |          | correction?                                                                                                                        |                      |
| <b>Domain 3: analysis and findings</b> |          |                                                                                                                                    |                      |
| <i>Data analysis</i>                   |          |                                                                                                                                    |                      |
| Number of data coders                  | 24       | How many data coders coded the data?                                                                                               | 2.1.3                |
| Description of the coding tree         | 25       | Did authors provide a description of the coding tree?                                                                              | n/a                  |
| Derivation of themes                   | 26       | Were themes identified in advance or derived from the data?                                                                        | 2.1.3                |
| Software                               | 27       | What software, if applicable, was used to manage the data?                                                                         | 2.1.3                |
| Participant checking                   | 28       | Did participants provide feedback on the findings?                                                                                 | n/a                  |
| <i>Reporting</i>                       |          |                                                                                                                                    |                      |
| Quotations presented                   | 29       | Were participant quotations presented to illustrate the themes/findings?<br>Was each quotation identified? e.g. participant number | 3.1.1, Table 2       |
| Data and findings consistent           | 30       | Was there consistency between the data presented and the findings?                                                                 | 3.1.1                |
| Clarity of major themes                | 31       | Were major themes clearly presented in the findings?                                                                               | 3.1.1                |
| Clarity of minor themes                | 32       | Is there a description of diverse cases or discussion of minor themes?                                                             | n/a                  |

Developed from: Tong A, Sainsbury P, Craig J. Consolidated criteria for reporting qualitative research (COREQ): a 32-item checklist for interviews and focus groups. *International Journal for Quality in Health Care*. 2007. Volume 19, Number 6: pp. 349 – 357

## References

1. Charman, C.R., A.J. Venn, and H.C. Williams, *The patient-oriented eczema measure: development and initial validation of a new tool for measuring atopic eczema severity from the patients' perspective*. Archives of dermatology, 2004. **140**(12): p. 1513-1519.
2. Finlay, A.Y. and G. Khan, *Dermatology Life Quality Index (DLQI)—a simple practical measure for routine clinical use*. Clinical and experimental dermatology, 1994. **19**(3): p. 210-216.
3. Snaith, R.P., *The hospital anxiety and depression scale*. Health and quality of life outcomes, 2003. **1**(1): p. 1-4.
4. Herrmann, C., *International experiences with the Hospital Anxiety and Depression Scale—a review of validation data and clinical results*. Journal of psychosomatic research, 1997. **42**(1): p. 17-41.
5. White, D., et al., *Validation of the Hospital Anxiety and Depression Scale for use with adolescents*. The British Journal of Psychiatry, 1999. **175**(5): p. 452-454.
6. Ramsay, B. and C. Lawrence, *Measurement of involved surface area in patients with psoriasis*. British Journal of Dermatology, 1991. **124**(6): p. 565-570.
7. Hanifin, J., et al., *The eczema area and severity index (EASI): assessment of reliability in atopic dermatitis*. Experimental dermatology, 2001. **10**(1): p. 11-18.
